# Supplementary material
Source: PubMed Central journal article supplement (PMC5983337)
Supplement: jci-128-99350-s370.pdf [file jci-128-99350-s370.pdf]

1 **Supplementary Material**

2

3 **Extended Materials and Methods**

4 *Tissue Culture*

5 293T HEK (ATCC) and mHypoE 42 (Cellutions Biosystems) cell lines were cultured with DMEM  
6 supplemented with 1% Pen/Strep, 10% Fetal Bovine Serum (all from Life Technologies), and maintained  
7 at 37°C in humidified incubator with 5% CO<sub>2</sub>. Adult primary neuronal hypothalamic cells were isolated  
8 as previously described (Brewer and Torricelli, 2007). Briefly, 4 hypothalami, per 6-well plate, from adult  
9 mice were punched out under sterile conditions, and neurons isolated using Papain Dissociation System  
10 (Worthington), following the manufacturer's protocol. Primary neurons were cultured on Poly-D-Lysine  
11 coated plates with Neurobasal medium, supplemented with B27, 2mM GlutaMAX, 1% Pen/Strep (all from  
12 Life Technologies) for a period of 2-3 weeks, with no more than 50% of the medium replaced twice a  
13 week.

14

15 *Preparation and validation of CRE-inducible AP-1 factors and galanin shRNA containing LV*

16 FLAG-tagged AP-1 factors were amplified by PCR from mouse cDNA with HiFi Hotstart Readymix  
17 (KAPA) using the following primer sets:

18  $\Delta$ FosB FLAG (F):

19 5'-

20 CTCGGATCCATGGACTACAAGGACGACGATGACAAGGGTGGTTCTGGTTTTCAAGCTTTTC

21 CCGGAGAC-3'

22  $\Delta$ FosB FLAG (R):

23 5'-AGTGGATCCTTACTCGGCCAGCGGGCCTGG-3'

24

25  $\Delta$ 2 $\Delta$ FosB FLAG (F):

26 5'-

27 CTCGGATCCATGGACTACAAGGACGACGATGACAAGGGTGGTTCTGGTGCCCAGTCCCAGG

28 GGCAGCCA-3'

29  $\Delta$ 2 $\Delta$ FosB FLAG (R):

30 5'-AGTGGATCCTTACTCGGCCAGCGGGCCTGG-3'

31

1 DNJunD FLAG (F):

2 5'-

3 CTCGGATCCATGGACTACAAGGACGACGATGACAAGGGTGGTTCTGGTCAAAGCCAGCTG  
4 GGTGCGGCC-3'

5 DNJunD FLAG (R):

6 5'-AGTGGATCCTCAGTACGCCGGGACCTGGTG-3'

7

8 FosB FLAG (F):

9 5'-

10 CTCGGATCCATGGACTACAAGGACGACGATGACAAGGGTGGTTCTGGTTTTCAAGCTTTTC  
11 CCGGAGAC-3'

12 FosB FLAG (R):

13 5'-AGTGGATCCTTACAGAGCAAGAAGGGAGGG-3'

14

15 FLAG inserts were ligated into subcloning PCR2.1TOPO vector (Life Technologies), excised with  
16 BamHI restriction enzyme (NEB), purified and then inserted with T4 ligase to BamHI cut-open pTomo  
17 vector (Addgene, #26291). Insert orientation was verified by sequencing.

18 To test the efficiency and CRE-specificity of the cloned constructs, they were transfected into 293T  
19 HEK cells, in the presence or absence of CAG-CRE. Western blots show that all four vectors exhibit  
20 detectable expression of FLAG and of their respective proteins, which are “silent” in the absence of CRE  
21 (Fig. S1B), confirming their CRE-inducibility. Moreover, CRE led, as expected, to a reduction in the RFP  
22 signal intensity with an unchanged GFP signal after transduction of AP1 LVs into either 293T HEK cells  
23 (Fig. S1C) or primary neurons isolated from the hypothalami of AgRP-CRE or POMC-CRE mice (Fig.  
24 S1D). qPCR analysis further confirmed the expression of specific AP1 factors in LV infected primary  
25 hypothalamic neurons. Having demonstrated the CRE-specific inducibility of our vectors, we then  
26 optimized the stereotaxic injection protocols and validated the specific anatomical region of the brain  
27 where our AP1 antagonists are expressed. For this purpose, the neuron-specific CRE mice were crossed  
28 with the reporter R26R-Brainbow2.1 mice, to allow individual neurons to be distinguished by fluorescent  
29 labels. These mice were then stereotaxically VHT-injected with CRE-inducible AP1 LVs and subjected  
30 to histological examination. Supporting previous findings, red fluorescence showed AgRP and POMC  
31 neurons being present mostly in the ARC region. Bilateral lentiviral vector injection, seen as yellow label

1 with a proportion of green, was shown to be delivered in the vicinity of neuronal cells of interest (Fig.  
 2 S1G). Examination of several sections anterior and posterior to the injection site showed no fluorescence,  
 3 confirming that the viral particles do not spread to large and undefined areas and remain restricted to the  
 4 injection site. To show neuron-specific expression of our constructs we performed immunostaining of  
 5 brain sections in mice injected with FLAG-tagged  $\Delta$ FosB LV. FLAG was colocalized with AgRP or  
 6 POMC in AgRP-CRE or POMC-CRE mice, respectively, and we did not observe FLAG staining in non-  
 7 targeted neuronal cells (we find no green signal in the absence of red), demonstrating, as expected, neuron-  
 8 specific  $\Delta$ FosB protein expression (Fig. S2A). Furthermore,  $\Delta$ FosB signal was colocalized with AgRP or  
 9 POMC in primary hypothalamic neurons isolated from AgRP-CRE or POMC-CRE mice, respectively  
 10 (Fig. S2B). Finally, to exclude a potential promoter “escape” *in vivo*, we injected AP-1 LV to the VHT of  
 11 C57BL (lacking CRE) mice and found no effect on energy expenditure, glucose metabolism, or bone  
 12 density (Fig. S3). Taken together these data supported the ability of our tools to selectively target  
 13 individual populations of VHT neurons, allowing their further evaluation in the AgRP- and POMC- CRE  
 14 mice models.

15 Empty pTomo and  $\Delta$ FosB FLAG pTomo were subsequently used to generate constructs carrying  
 16 scrambled or galanin shRNA. First, scrambled shRNA and 3 galanin shRNA oligos were ligated to  
 17 pSilencer3.1-H1 neo vector (Life Technologies). The following oligo sets were used:

18 Scrambled shRNA:

19 5’-

20 GATCCCCTAAGGTTAAGTCGCCCTCTTCAAGAGAGAGGGCGACTTAACCTTAGGTTTTTTGG

21 AAA-3’

22 3’-

23 GGCGGATTCCAATTCAGCGGGAGAAGTTCTCTCTCCCGCTGAATTGGAATCCAAAAACCTTT

24 TCGA-5’

25 Galanin shRNA1:

26 5’-

27 GATCCCAGATCATTTAGCGACAAGTTCAAGAGACTTGTCGCTAAATGATCTGTTTTTTGGAA

28 A-3’

29 3’-

30 GGCGTCTAGTAAATCGCTGTTCAAGTTCTCTGAACAGCGATTTACTAGACAAAAACCTTTTC

31 GA-5’

1 Galanin shRNA2:

2 5'-

3 GATCCGGAGACCAGGAAGTGTTGATTTCAAGAGAATCAACACTTCCTGGTCTCCTTTTTTGG

4 AAA-3'

5 3'-

6 GCCTCTGGTCCTTCACAATAAGTTCTCTTAGTTGTGAAGGACCAGAGGAAAAAACCTTTTC

7 GA-5'

8 Galanin shRNA3:

9 5'-

10 GATCCGCAACATTGTCCGCACTATATTCAAGAGATATAGTGCGGACAATGTTGCTTTTTTGG

11 AAA-3'

12 3'-

13 GCGTTGTAACAGGCGTGATATAAGTTCTCTATATCACGCCTGTTACAACGAAAAAACCTTTTC

14 GA-5'

15 H1 promoter and shRNA sequence were excised with EcoRI restriction enzyme and subcloned into  
 16 EcoRI linearized Empty pTomo or ΔFosB FLAG pTomo vectors. Sequenced and validated constructs  
 17 were packaged into third generation LV system (Addgene) using 293T HEK cells, as previously described  
 18 (Tiscornia et al., 2006). Viral titer was assessed and particle aliquots were stored at -80C for further use.

19  
 20 *Western blot evaluation of CRE-inducible AP-1 factors expression*

21 293T HEK cells were grown to 50% confluence and transfected with AP-1 FLAG tagged pTomo  
 22 constructs in the presence of CAG-CRE (Addgene) or empty vector control. 48 hours post-transfection,  
 23 cells were lysed using SBN buffer: 1 mM EDTA, 50 mM Tris-HCl, 150 mM NaCl, 10% Glycerol, 1%  
 24 NP40, pH 7.5 containing protease inhibitor cocktail (Sigma-Aldrich). Following 15 minutes incubation  
 25 on ice, cell lysates were collected, centrifuged at 12,000 g for 15 min and supernatants were stored at -  
 26 20°C. Total protein quantification was performed using BCA protein assay kit (Thermo Scientific). Equal  
 27 amounts of protein (50 μg) were heated in 1X loading buffer containing 1% DTT at 100°C for 5 min,  
 28 subjected to 10-15% SDS-PAGE, and transferred to nitrocellulose membrane using semi-dry TransBlot  
 29 Turbo (BioRad). The following primary antibodies were used in 1:1000 dilution in 5% bovine serum  
 30 albumin in PBS blocking solution: mouse anti-FLAG (Sigma, #F7425), rabbit anti-deltaFosB (Cell  
 31 Signaling, #9890), rabbit anti-FosB (Cell Signaling, #2263), rabbit anti-JunD (AbCam, #ab28837)

1 Respective secondary anti-mouse HRP (Cell Signaling, #7056) and anti-rabbit HRP antibodies (Cell  
2 Signaling, #7074) were used at 1:10,000 in 5% dry milk in PBS. Signal was developed with Western  
3 Lightning Plus ECL (PerkinElmer).

4

5 *Immunohistochemical analysis of  $\Delta$ FosB expression in primary neurons and brain sections*

6 Primary hypothalamic neurons were isolated using Papain Dissociation System (Worthington) and  
7 maintained in poly-D-lysine coated plates with Neurobasal medium (Life Technologies), supplemented  
8 with Glutamax and B27 (Life Technologies). For IHC, cells were washed, fixed in 4% paraformaldehyde,  
9 and incubated with rabbit anti- $\Delta$ FosB (Cell Signaling, #9890) and goat anti-AgRP (AbCam, #ab32882)  
10 or goat anti-POMC (AbCam, #ab32893), using secondary anti-rabbit Alexa Fluor 488 (ThermoFisher,  
11 #A11034), and anti-goat Alexa Fluor 405 antibodies (AbCam, #ab175664). CRE-inducible  $\Delta$ FosB LV  
12 were injected in VHT of AgRP-CRE or POMC-CRE mice and sacrificed 4 days post-operatively. Briefly,  
13 animals were subjected to cardiac perfusion with 4% PFA, brains removed, soaked first overnight at 4%  
14 PFA and then overnight at 30% sucrose, embedded in OCT compound (Tissue Tek) and sectioned on  
15 cryostat at -20C, at 20  $\mu$ m. Frozen sections were fixed with 4% PBS and subjected to IHC staining with  
16 primary rabbit anti-FLAG (AbCam, #ab1162), mouse anti-AgRP (AbCam, #ab89114) or mouse anti-  
17 POMC (AbCam, #ab73092) and secondary anti-rabbit Alexa Fluor 488 (ThermoFisher, #A11034) and  
18 anti-mouse Alexa Fluor 568 (ThermoFisher, #A11031).

19

20 *mRNA quantification with real-time PCR*

21 Total RNA was extracted using TRI-reagent PureLink RNA Mini Kit (Life Technologies) and reverse  
22 transcribed using PrimeScript RT Master Mix (Clontech). cDNA was diluted 1:25 and used for real-time  
23 qPCR with FastStart Universal SYBR Green Master with Rox (Roche) and StepOnePlus Real-Time PCR  
24 System (Applied Biosystems). Gene expression was normalized to one of the house-keeping genes,  
25 HPRT, GAPDH, or 36B4, and the data were analyzed using comparative  $2^{-\Delta\Delta C_t}$  method.

26

27 *FACS sorting of AgRP and POMC neurons*

28 AgRP-CRE (or POMC-CRE) mice were crossed with reporter BrainbowRosa26-2.1 marking all  
29 AgRP (or POMC) neurons single, unique color (predominantly red). Recombined mice were then VHT  
30 injected with GFP-AAV or  $\Delta$ FosB-AAV (green), primary hypothalamic neurons isolated and subjected to

1 BD FACSAriaII counting, analysis and sorting using PE-A filter for red fluorescence and FITC-A for  
 2 green fluorescence. A population displaying both red and green constitutes AgRP (or POMC) neurons  
 3 infected with AAV. 500 cells were collected and subjected to gene expression analysis by qPCR

4

5 *ΔFosB chromatin immunoprecipitation (ChIP) and galanin luciferase assays*

6 For ΔFosB ChIP, mHypoE 42 cell line was transfected with ΔFosB FLAG pTomo in combination  
 7 with either CAG-CRE construct (Addgene) or empty-vector control (n = 3). ChIP was performed using  
 8 anti-FLAG antibodies (Sigma) and SimpleChIP Plus Enzymatic Chromatin IP kit (CellSignaling)  
 9 according to manufacturer instructions. Specific primers were designed to detect short sequences from the  
 10 evolutionary conserved regions (ECRs) positioned upstream of galanin transcription site (TSS), including  
 11 promoter (1 kb upstream of TSS), ECR1 (2.5 kb upstream of TSS) and ECR2 (5.4 kb upstream of TSS):

12 Galanin promoter (chr19:3414393-3414610): (F)CGCTGCTGCCGCTATTTATG,  
 13 (R)CCTTGGGACTCGCAGGAG

14 Galanin ECR1 (chr19:3416713-3416900): (F)ATGGACTCCTCACTCAGCAATG,  
 15 (R)TGGTGACCCATTTTGCTAGC

16 Galanin ECR2 (chr19:3419379-3419587): (F)GTGACTCACCCAGCTCAGC,  
 17 (R)TGGACAATGCTACGGGTCTG

18 For the galanin luciferase activation assay, two fragments of increasing length from TSS were  
 19 subcloned into the luciferase dual reporter plasmid pEZX-PG04 (GeneCopoeia), both containing promoter  
 20 region. Additionally, these constructs contained a CMV-driven alkaline phosphatase sequence (SEAP),  
 21 used to assess transfection efficiency. The following regions were subcloned into Gal pEZX-PG04  
 22 constructs: Gal 1.0 kb (1008 kb upstream and 244 bp downstream of TSS) and Gal 2.5 kb (2500 kb  
 23 upstream and 244 bp downstream of TSS). Gal-GTRE-WT-pEZX-PG04 construct was engineered by  
 24 subcloning 3414264 to 3414526 (288 bp) galanin promoter region, containing the GTRE site  
 25 (TGACGCGG) or mutant GTRE site (GGCAGCGG), using XhoI restriction digest. HEK-293 cells were  
 26 cotransfected with Gal pEZX-PG04 constructs in combination with pcDNA vectors encoding the FosB  
 27 isoforms (FosB and ΔFosB) and JunD isoforms (JunD and DNJunD). The total amount of transfected  
 28 DNA was maintained at 0.3μg and transfection efficiency was assessed by measuring SEAP  
 29 luminescence. 36 hours following transfection, a dual luminescence assay for Gaussia luciferase and  
 30 SEAP was performed according to the manufacturer's instructions.

1  
2  
3  
4  
5  
6  
7  
8  
9  
10  
11  
12  
13  
14  
15  
16  
17  
18  
19  
20  
21  
22  
23  
24  
25  
26  
27  
28  
29  
30

### *Central blockade of galanin receptors with M35*

For the galanin receptor blocker, M35 (AnaSpec) study, in addition to  $\Delta$ FosB or GFP AAV injection, C57BL mice underwent intrascapular implantation of osmotic pumps containing 10, 100, or 1000  $\mu$ M of M35 (vehicle as control) connected by a catheter to a cannula (Brain Infusion Kit 2, Alzet). Cannulas were placed in the 3<sup>rd</sup> ventricle using the following stereotaxic coordinates: AP = 2.0, DV = -5.7, LAT = 0, infusing M35 for a period of 2 weeks, followed by metabolic and bone analysis. For the evaluation of injection site, animals were subjected to cardiac perfusion with 4% PFA, brains removed, soaked overnight in 30% sucrose and sectioned on cryostat at -20C. For histological evaluation of adipose tissue and bone, organs were harvested, fixed in 4% PFA, placed in paraffin blocks, sectioned, and subjected to standard H&E staining. Adipocyte area was assessed using Adiposoft plugin for ImageJ. For real time mRNA analysis, tissues were snap frozen in liquid nitrogen and stored at -80C until RNA extraction.

### *Glucose tolerance test and insulin tolerance test*

Glucose tolerance test (GTT) was performed by administrating glucose (2.0 mg/g BW, Sigma) i.p. after a 16-hr fast. Blood glucose levels were monitored using glucose test strips and a glucometer (OneTouch ultra, LifeScan) at indicated times. Blood was also collected from tails using EDTA-treated microcapillaries and plasma insulin levels were measured using an EIA kit (ALPCO). For insulin tolerance test (ITT), mice were fasted for 4 hrs and injected insulin (1.0 mU/g BW, Lilly) intraperitoneally, and blood glucose levels were measured at indicated times. ITT data are presented as percentage of initial blood glucose concentration.

### *Fat pad H&E staining and adipocyte morphometry*

Abdominal fat pads were removed, weighted and processed into formalin-fixed-paraffin-embedded blocks, cut into 4  $\mu$ m sections, mounted on slides and stained using a standard H&E protocol. Sections were examined under light microscope (Nikon Eclipse E800 with FDX35 camera). ImageJ Adiposoft plug-in was used to measure adipocyte area. Plots under the images of H&E stained fat pads represent a distribution of all adipocytes and their respective areas (arbitrary units).

### *Insulin pancreatic $\beta$ -cell immunohistochemistry*

1 Pancreases were collected, fixed overnight in 4% PFA, embedded in paraffin and sectioned at 5  $\mu$ m.  
2 Sections were immunostained using rabbit anti-insulin polyclonal antibody (Cell Signaling, #4590) and  
3 counterstained with hematoxylin. Quantitative histomorphometric analysis of islet area and number was  
4 performed using Image J software (National Institute of Health).

5  
6 Data are available on request from the authors.  
7  
8  
9  
10  
11  
12  
13  
14  
15  
16  
17  
18  
19  
20  
21  
22  
23  
24  
25  
26  
27  
28  
29  
30



1  
2

Supplementary Figures

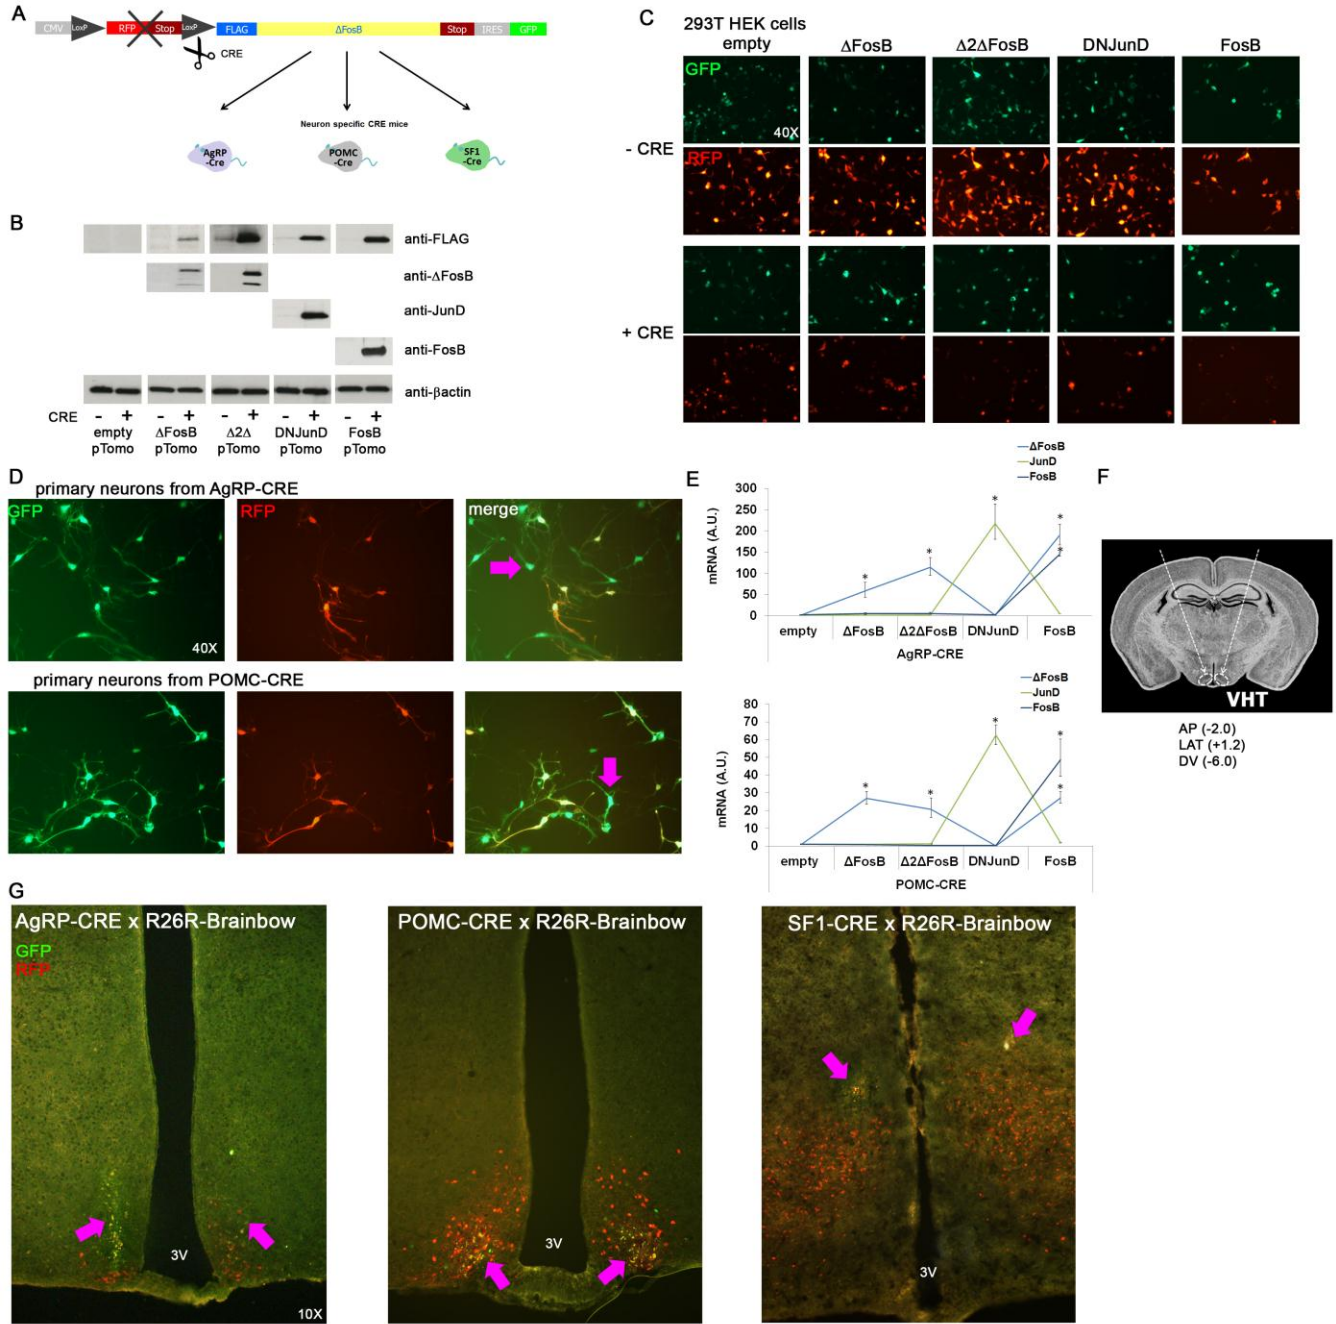

3

4 **Figure S1. Generation of CRE-inducible AP-1 construct carrying LV. Related to Figure 1 and Figure**  
 5 **2.** A. Experimental approach scheme, representing pTomo construct with CMV-promoter driven floxed  
 6 RFP and stop codon, followed by FLAG tagged AP-1 factor (ΔFosB, Δ2ΔFosB, DNJunD, or FosB) and  
 7 IRES GFP. These CRE-inducible constructs were packaged into LV and stereotaxically delivered to the

1 VHT of neuronal promoter CRE mice, ensuring expression of AP-1 factor only in the neuron of interest  
2 (namely, AgRP, POMC, or SF-1). B. Western Blot 293T HEK cells transfected with constructs, in the  
3 absence or presence of CAG-CRE. C. Fluorescent imaging of constructs transfected into 293T HEK cells,  
4 in the absence or presence of CAG-CRE. D. Fluorescent imaging of primary hypothalamic neurons  
5 isolated from AgRP-CRE and POMC-CRE adult mice, and cultured for a week with Empty LV. Note the  
6 disappearance of RFP signal in selected AgRP and POMC neurons, as it is excised by CRE (pink arrows).  
7 E. Real-time PCR analysis of AP-1 factors mRNA expression following transduction of primary  
8 hypothalamic neuronal cultures isolated from AgRP-CRE or POMC-CRE mice with CRE-inducible AP-  
9 1 LV. Note that in the FosB group, both  $\Delta$ FosB and FosB primers recognize FosB expression, since  $\Delta$ FosB  
10 is a truncated version of FosB lacking 101 C-terminal amino acids (n=4, t-test \*p<0.05). F. Stereotaxic  
11 injection coordinates. G. Neuronal promoter CRE mice crossed with reporter R26R-Brainbow2.1 and  
12 injected with Empty LV. Yellow blobs with specks of green indicate LV injection site, in the vicinity of  
13 bright red ARC or VMH neurons.

**A**  $\Delta$ FosB LV in **AgRP-CRE** hypothalami IHC

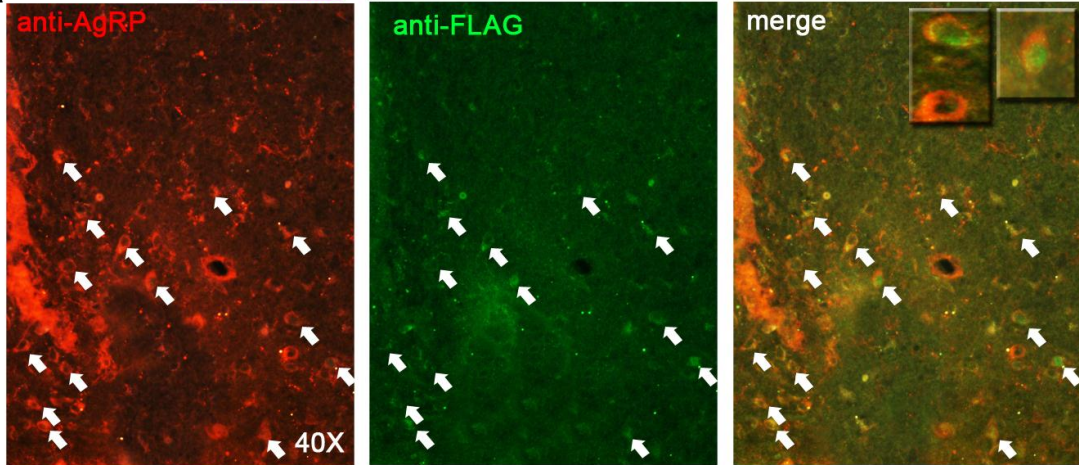

$\Delta$ FosB LV in **POMC-CRE** hypothalami IHC

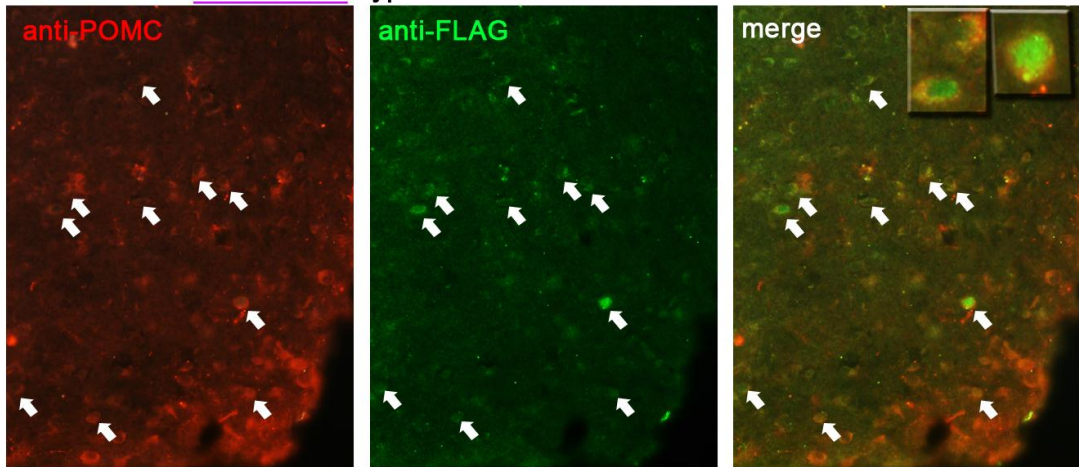

**B** primary neurons from **AgRP-CRE** IHC

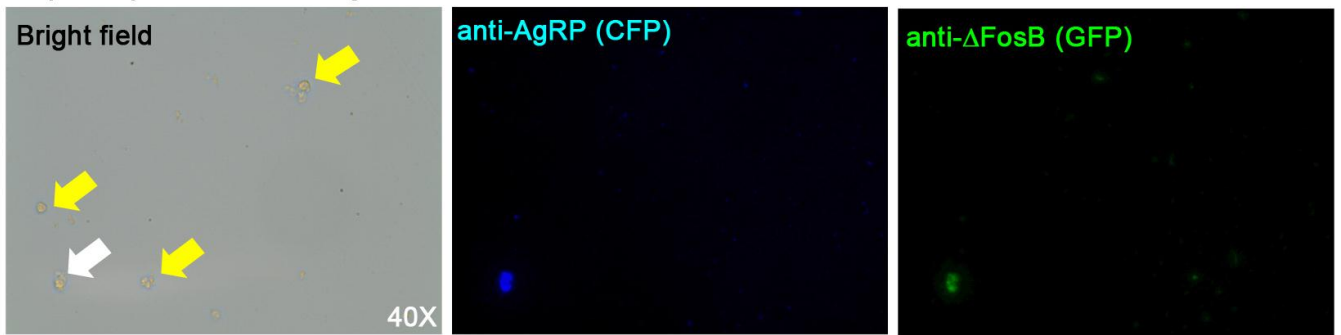

primary neurons from **POMC-CRE** IHC

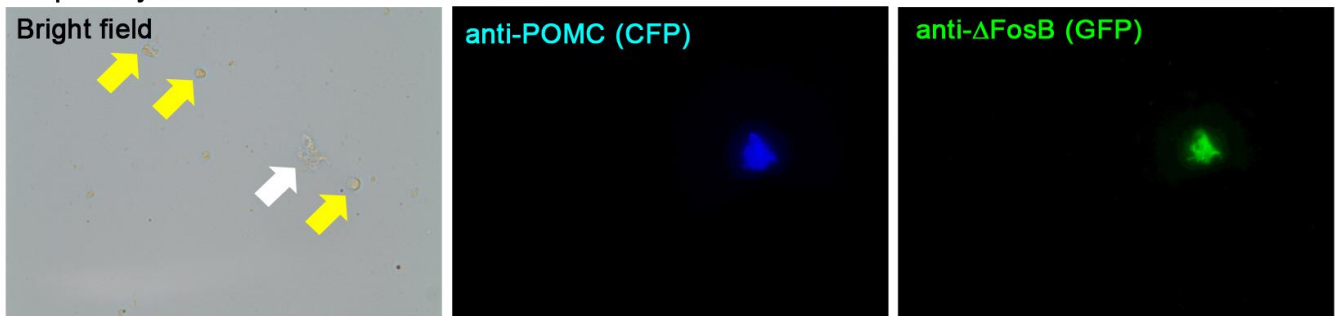

1 **Figure S2. Neuron specific expression of CRE-inducible AP-1 construct carrying LV. Related to**  
2 **Figure 1 and Figure 2.** A. IHC staining of hypothalami of AgRP-CRE or POMC-CRE mice VHT injected  
3 with CRE-inducible FLAG tagged  $\Delta$ FosB LV. White arrows point at neurons where AgRP (or POMC) is  
4 colocalized with  $\Delta$ FosB, indicating specific neuronal expression.  $\Delta$ FosB signal was not observed in other  
5 neuron types (no green without red) (n=4). Note that as expected as well, the neuromediators are localized  
6 in the cytosol when  $\Delta$ FosB is expressed in the nucleus (see high magnification inserts). B. IHC staining  
7 of primary neurons isolated from AgRP-CRE or POMC-CRE mice injected with CRE-inducible FLAG  
8 tagged  $\Delta$ FosB LV, showing specific  $\Delta$ FosB expression in AgRP- or POMC-positive neurons, respectively.  
9 White arrows point at neurons where AgRP (or POMC) is colocalized with  $\Delta$ FosB, indicating specific  
10 neuronal expression. Yellow arrows point at neurons negative for  $\Delta$ FosB and neuropeptide of interest  
11 (n=4).

12

13

14

15

16

17

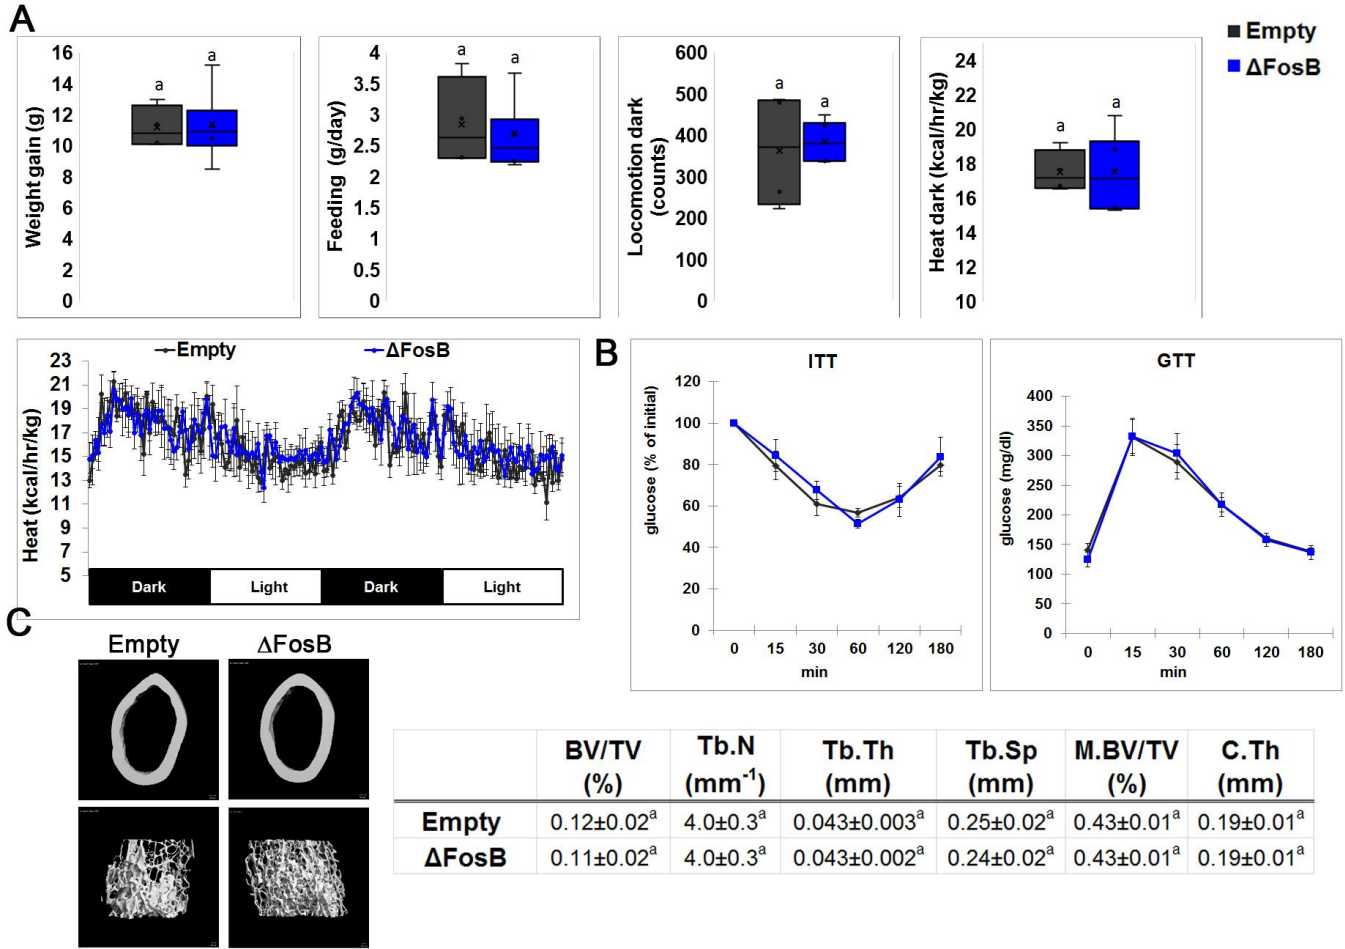

1

2

3 **Figure S3. CRE-inducible ΔFosB LV has no effect on metabolism or bone in wild-type C57BL mice.**

4 *Related to Figure 1 and Figure 2.* CRE-inducible AP-1 LV were validated with wild-type (non-CRE

5 bearing) mice, by means of stereotaxic VHT delivery and assessment of energy metabolism and bone

6 parameters 6 weeks post-operatively. A. Weight gain, feeding, locomotion, and calorimetric analysis of

7 energy expenditure measured by CLAMS. B. Insulin tolerance test and glucose tolerance test. C. Bone

8 parameters measured by micro-CT. Statistical analysis included ANOVA followed by Tukey-Kramer

9 HSD test,  $p < 0.05$  comparing 2 groups ( $n = 4$  animals per group).

10

### AgRP neurons

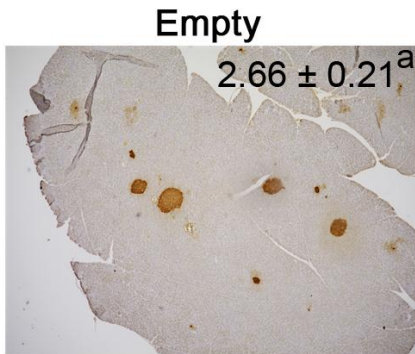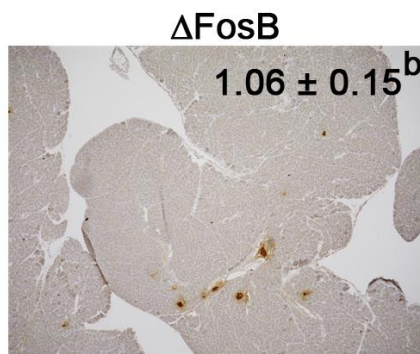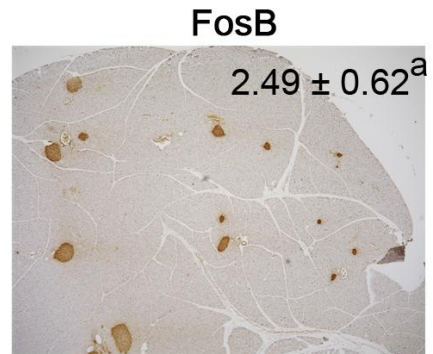

### POMC neurons

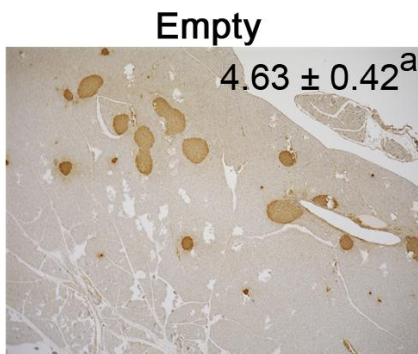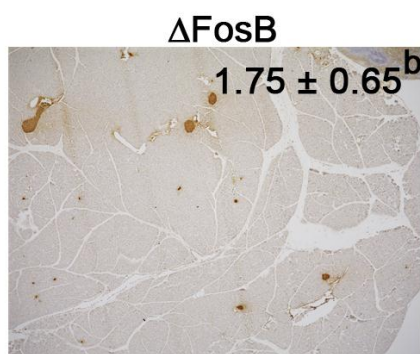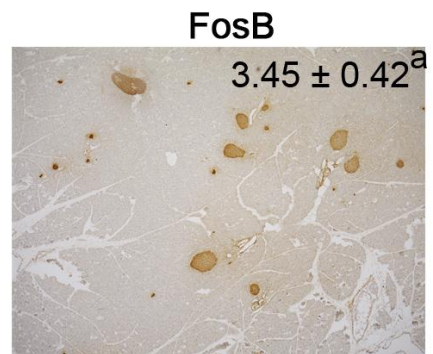

### SF1 neurons

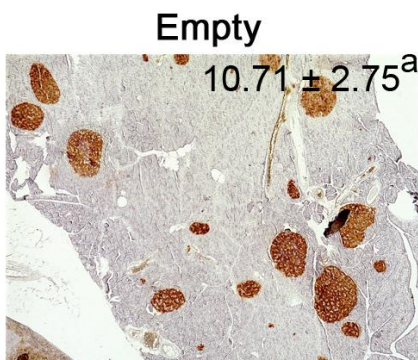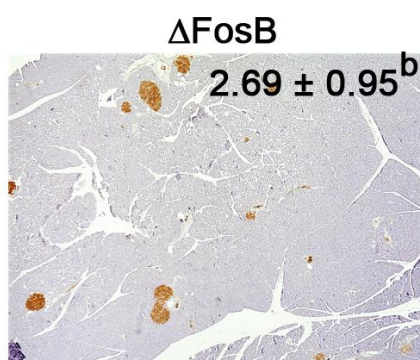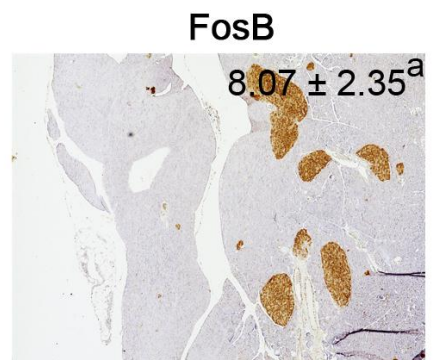

1

2 **Figure S4. AP-1 blockade in AgRP, POMC, and SF1 neurons reduces  $\beta$ -cell islet size. Related to**  
 3 **Figures 1, 2, and 7.** Male 6-7 week old AgRP-CRE, POMC-CRE, or SF1-CRE mice were stereotaxically  
 4 injected into VHT with CRE-inducible  $\Delta$ FosB or FosB LV and pancreases assessed 8 weeks post-surgery  
 5 (n=6-9 animals per group). The figure shows insulin immunohistochemistry, counterstained with

1 hematoxylin. The numbers indicate average area occupied by islets. Statistical analysis included ANOVA  
2 followed by Tukey-Kramer HSD test,  $p < 0.05$  comparing 3 groups.

3  
4  
5  
6  
7  
8  
9  
10  
11  
12  
13  
14  
15  
16

|          |                                | <b>MAR</b><br>( $\mu\text{m}/\text{day}$ )  | <b>BFR/BS</b><br>( $\mu\text{m}^3/\mu\text{m}^2/\text{day}$ ) | <b>Ob/BS</b><br>(%)                          | <b>Oc/BS</b><br>(%)          |
|----------|--------------------------------|---------------------------------------------|---------------------------------------------------------------|----------------------------------------------|------------------------------|
| AgRP-CRE | <b>Empty</b>                   | 1.10 $\pm$ 0.11 <sup>b</sup>                | 0.46 $\pm$ 0.08 <sup>b</sup>                                  | 8.67 $\pm$ 5.43 <sup>b</sup>                 | 7.79 $\pm$ 3.40 <sup>a</sup> |
|          | <b><math>\Delta</math>FosB</b> | <b>1.52<math>\pm</math>0.22<sup>a</sup></b> | <b>0.72<math>\pm</math>0.14<sup>a</sup></b>                   | <b>17.18<math>\pm</math>4.03<sup>a</sup></b> | 6.79 $\pm$ 2.21 <sup>a</sup> |
|          | <b>FosB</b>                    | 1.14 $\pm$ 0.07 <sup>ab</sup>               | 0.55 $\pm$ 0.20 <sup>ab</sup>                                 | 13.75 $\pm$ 0.31 <sup>b</sup>                | 5.48 $\pm$ 2.94 <sup>a</sup> |
|          |                                | <b>MAR</b><br>( $\mu\text{m}/\text{day}$ )  | <b>BFR/BS</b><br>( $\mu\text{m}^3/\mu\text{m}^2/\text{day}$ ) | <b>Ob/BS</b><br>(%)                          | <b>Oc/BS</b><br>(%)          |
| POMC-CRE | <b>Empty</b>                   | 1.01 $\pm$ 0.24 <sup>b</sup>                | 0.42 $\pm$ 0.12 <sup>b</sup>                                  | 12.63 $\pm$ 2.31 <sup>a</sup>                | 7.47 $\pm$ 2.07 <sup>a</sup> |
|          | <b><math>\Delta</math>FosB</b> | <b>1.61<math>\pm</math>0.26<sup>a</sup></b> | <b>0.80<math>\pm</math>0.13<sup>a</sup></b>                   | 15.03 $\pm$ 6.80 <sup>a</sup>                | 5.34 $\pm$ 1.71 <sup>a</sup> |
|          | <b>FosB</b>                    | 1.24 $\pm$ 0.39 <sup>ab</sup>               | 0.64 $\pm$ 0.12 <sup>ab</sup>                                 | 11.33 $\pm$ 1.90 <sup>a</sup>                | 6.55 $\pm$ 1.38 <sup>a</sup> |
|          |                                | <b>MAR</b><br>( $\mu\text{m}/\text{day}$ )  | <b>BFR/BS</b><br>( $\mu\text{m}^3/\mu\text{m}^2/\text{day}$ ) | <b>Ob/BS</b><br>(%)                          | <b>Oc/BS</b><br>(%)          |
| SF1-CRE  | <b>Empty</b>                   | 1.11 $\pm$ 0.29 <sup>a</sup>                | 0.45 $\pm$ 0.16 <sup>a</sup>                                  | 10.05 $\pm$ 3.33 <sup>a</sup>                | 5.41 $\pm$ 1.19 <sup>a</sup> |
|          | <b><math>\Delta</math>FosB</b> | 1.12 $\pm$ 0.35 <sup>a</sup>                | 0.53 $\pm$ 0.28 <sup>a</sup>                                  | <b>5.68<math>\pm</math>2.02<sup>b</sup></b>  | 4.41 $\pm$ 1.42 <sup>a</sup> |
|          | <b>FosB</b>                    | 1.13 $\pm$ 0.00 <sup>a</sup>                | 0.67 $\pm$ 0.03 <sup>a</sup>                                  | 12.57 $\pm$ 4.63 <sup>a</sup>                | 3.53 $\pm$ 1.16 <sup>a</sup> |

1

2

3 **Figure S5. Differential effects of AP1 expression in AgRP, POMC or SF1 neurons on bone dynamic**  
4 **parameters. Related to Figures 1, 2.** Male 6-7 week old AgRP-CRE, POMC-CRE, or SF1-CRE mice  
5 were stereotaxically injected into VHT with CRE-inducible AP-1 ( $\Delta$ FosB,  $\Delta$ 2 $\Delta$ FosB, DNJunD, or FosB)  
6 LV, labeled with calcein and demeclocyclin, and assessed 8 weeks post-surgery. The table shows tibiae  
7 histomorphometry. Statistical analysis included ANOVA followed by Tukey-Kramer HSD test,  $p < 0.05$   
8 comparing 5 groups (n=3-9 animals per group).

9



AgRP neurons

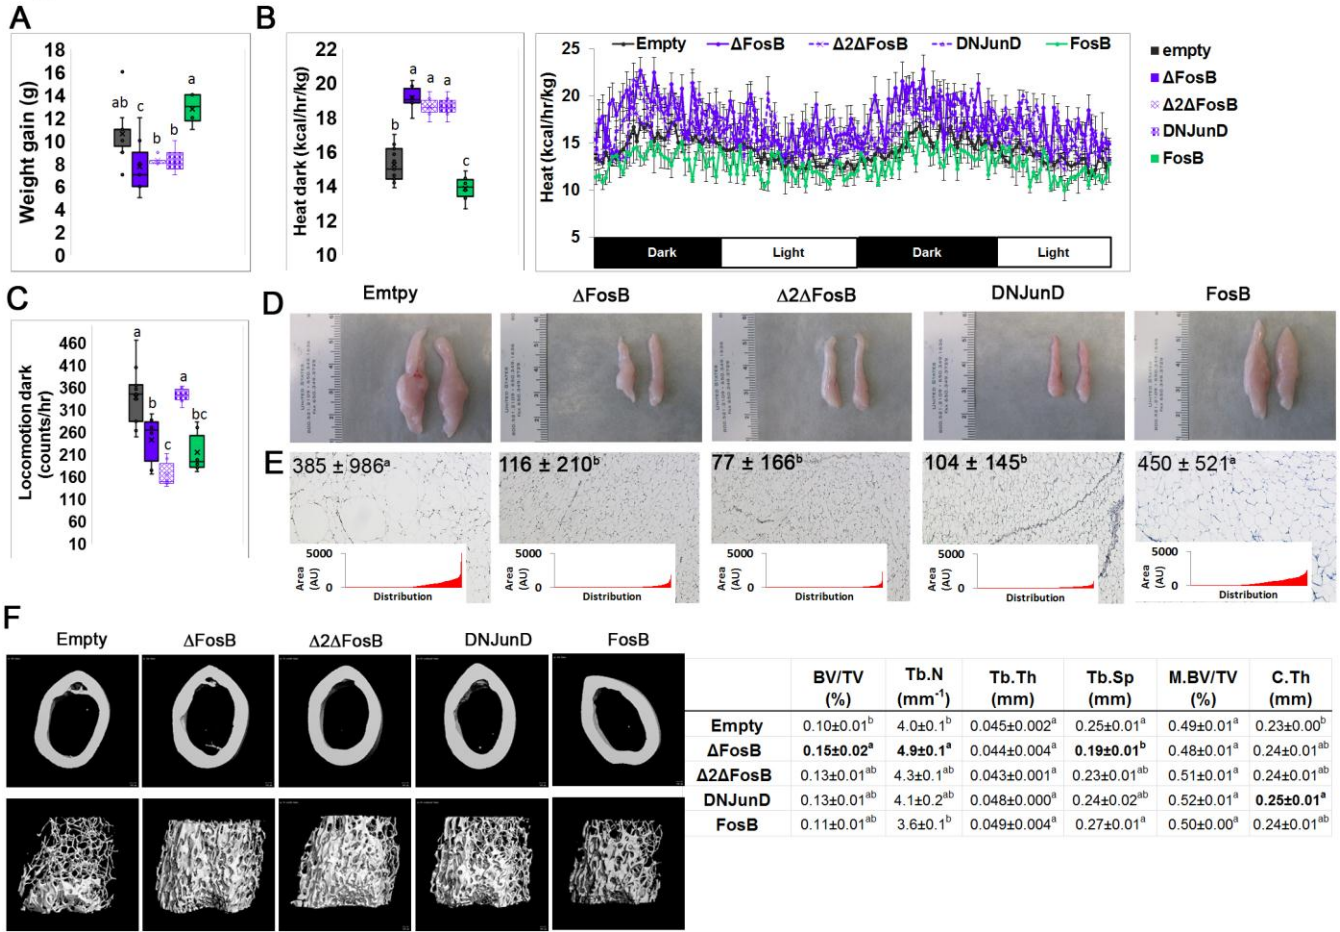

1

2 **Figure S6. AP-1 antagonism in AgRP neurons increases energy expenditure and elevates bone**  
 3 **density. Related to Figure 1.** Male 6-7 week old AgRP-CRE mice were stereotaxically injected into VHT  
 4 with CRE-inducible AP-1 ( $\Delta$ FosB,  $\Delta$ 2 $\Delta$ FosB, DNJunD, or FosB) LV and metabolic and bone profiles  
 5 were assessed 6 weeks post-surgically. A. Weight gain at 3 and 6 weeks. B. Calorimetric analysis of  
 6 energy expenditure. C. Locomotion. D. Representative images of gross biopsy of abdominal fat pads. E.  
 7 H&E stained sections of abdominal fat pads. Top left values and bottom left graphs correspond to  
 8 adipocyte area mean and distribution. F. Bone parameters measured by micro-CT. Statistical analysis  
 9 included ANOVA followed by Tukey-Kramer HSD test,  $p < 0.05$  comparing 5 groups (n=6-9 animals per  
 10 group).

11

POMC neurons

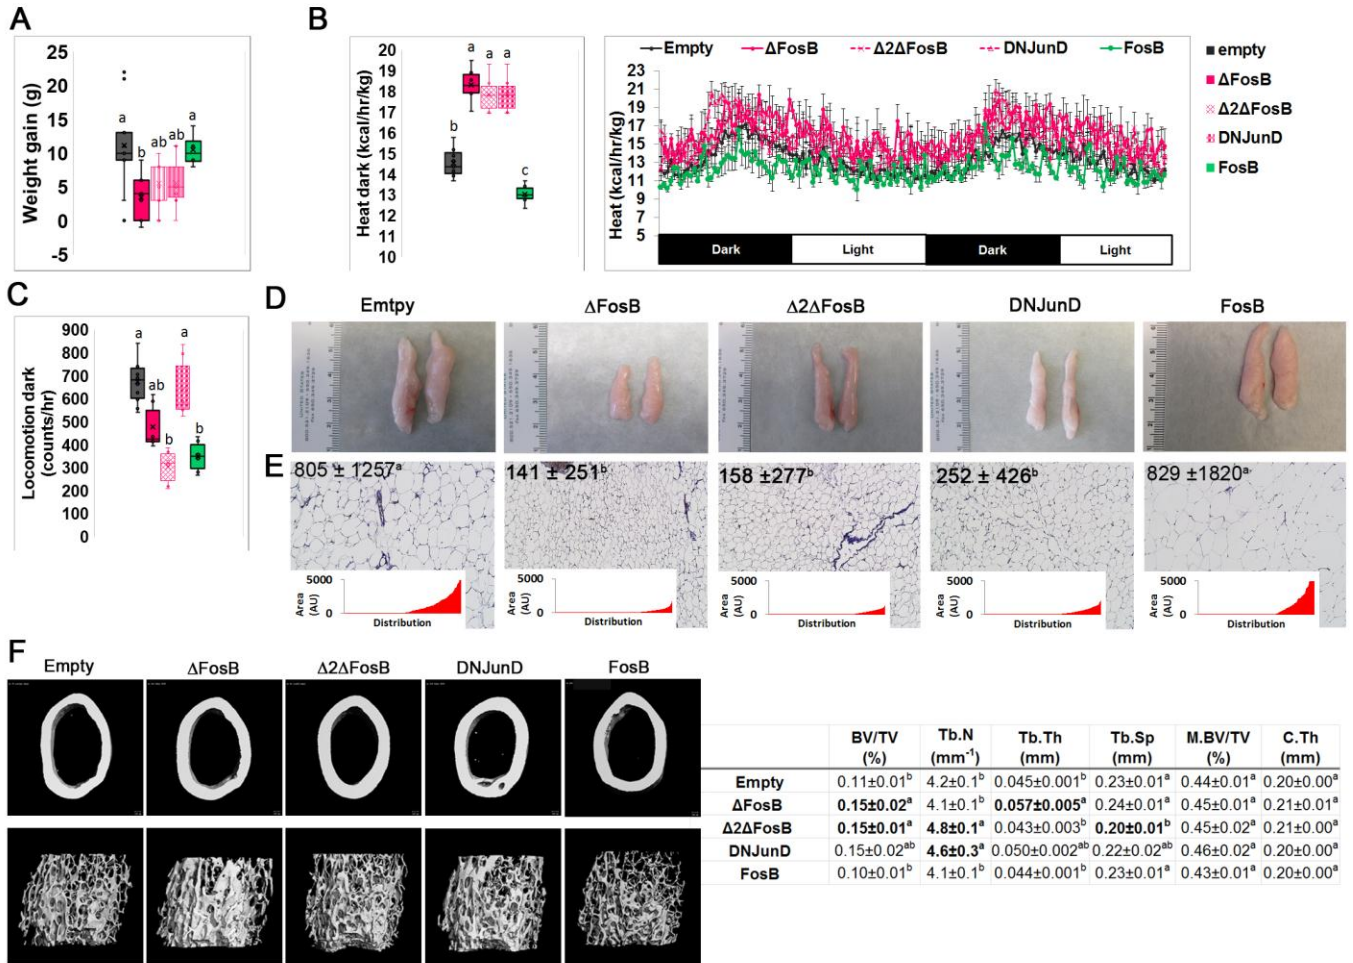

1  
2  
3  
4  
5  
6  
7  
8  
9  
10  
11  
12  
13

**Figure S7. AP-1 antagonism in POMC neurons increases energy expenditure and elevates bone density. Related to Figure 2.** Male 6-7 week old POMC-CRE mice were stereotaxically injected into VHT with CRE-inducible AP-1 (ΔFosB, Δ2ΔFosB, DNJunD, or FosB) LV and metabolic and bone profiles were assessed 6 weeks post-surgically. A. Weight gain at 3 and 6 weeks. B. Calorimetric analysis of energy expenditure. C. Locomotion. D. Representative images of gross biopsy of abdominal fat pads. E. H&E stained sections of abdominal fat pads. Top left values and bottom left graphs correspond to adipocyte area mean and distribution. F. Bone parameters measured by micro-CT. Statistical analysis included ANOVA followed by Tukey-Kramer HSD test, p<0.05 comparing 5 groups (n=6-9 animals per group).

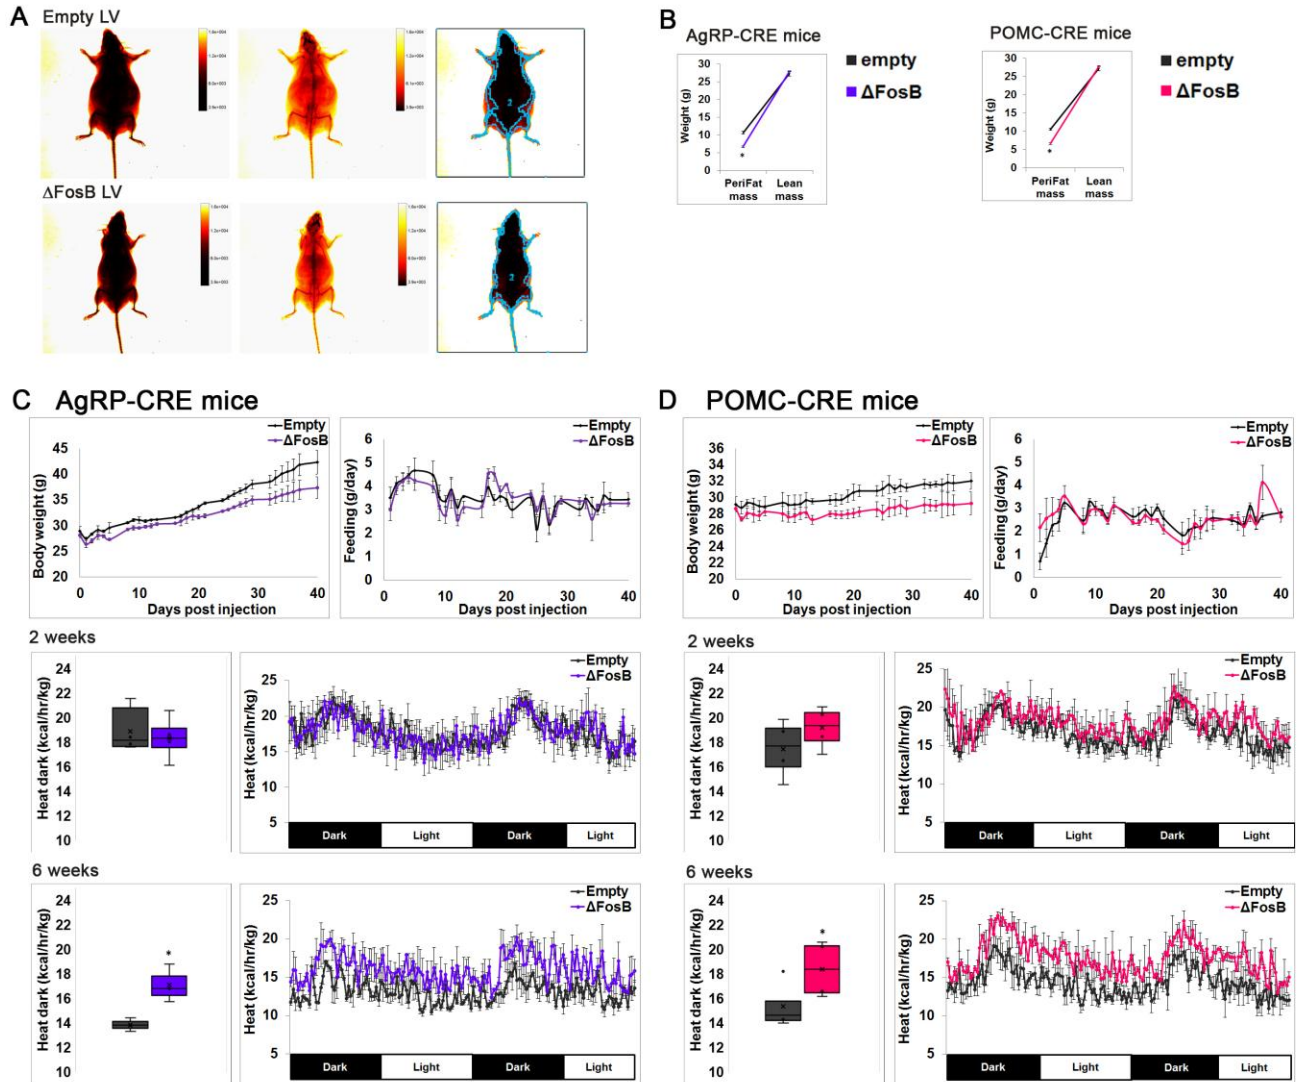

1

2

3 **Figure S8. AP-1 antagonism in AgRP and POMC neurons does not affect feeding. Related to Figures**

4 **1,2.** Male 6-7 week old AgRP-CRE and POMC-CRE mice were stereotactically injected into VHT with

5 CRE-inducible ΔFosB or Empty control LV. Feeding was monitored manually for a period of 6 weeks

6 post-operatively, energy expenditure was assessed at 2 and 6 weeks post-operatively, normalized to lean

7 body mass, as measured by DXA. A. Representative DXA images. B. Peripheral fat mass and lean mass.

8 C. Body weight, feeding and calorimetric analysis of energy expenditure in AgRP-CRE mice. D. Body

9 weight, feeding and calorimetric analysis of energy expenditure in POMC-CRE mice. Statistical analysis

10 included student t-test,  $p < 0.05$  ( $n = 4-5$  animals per group).

11

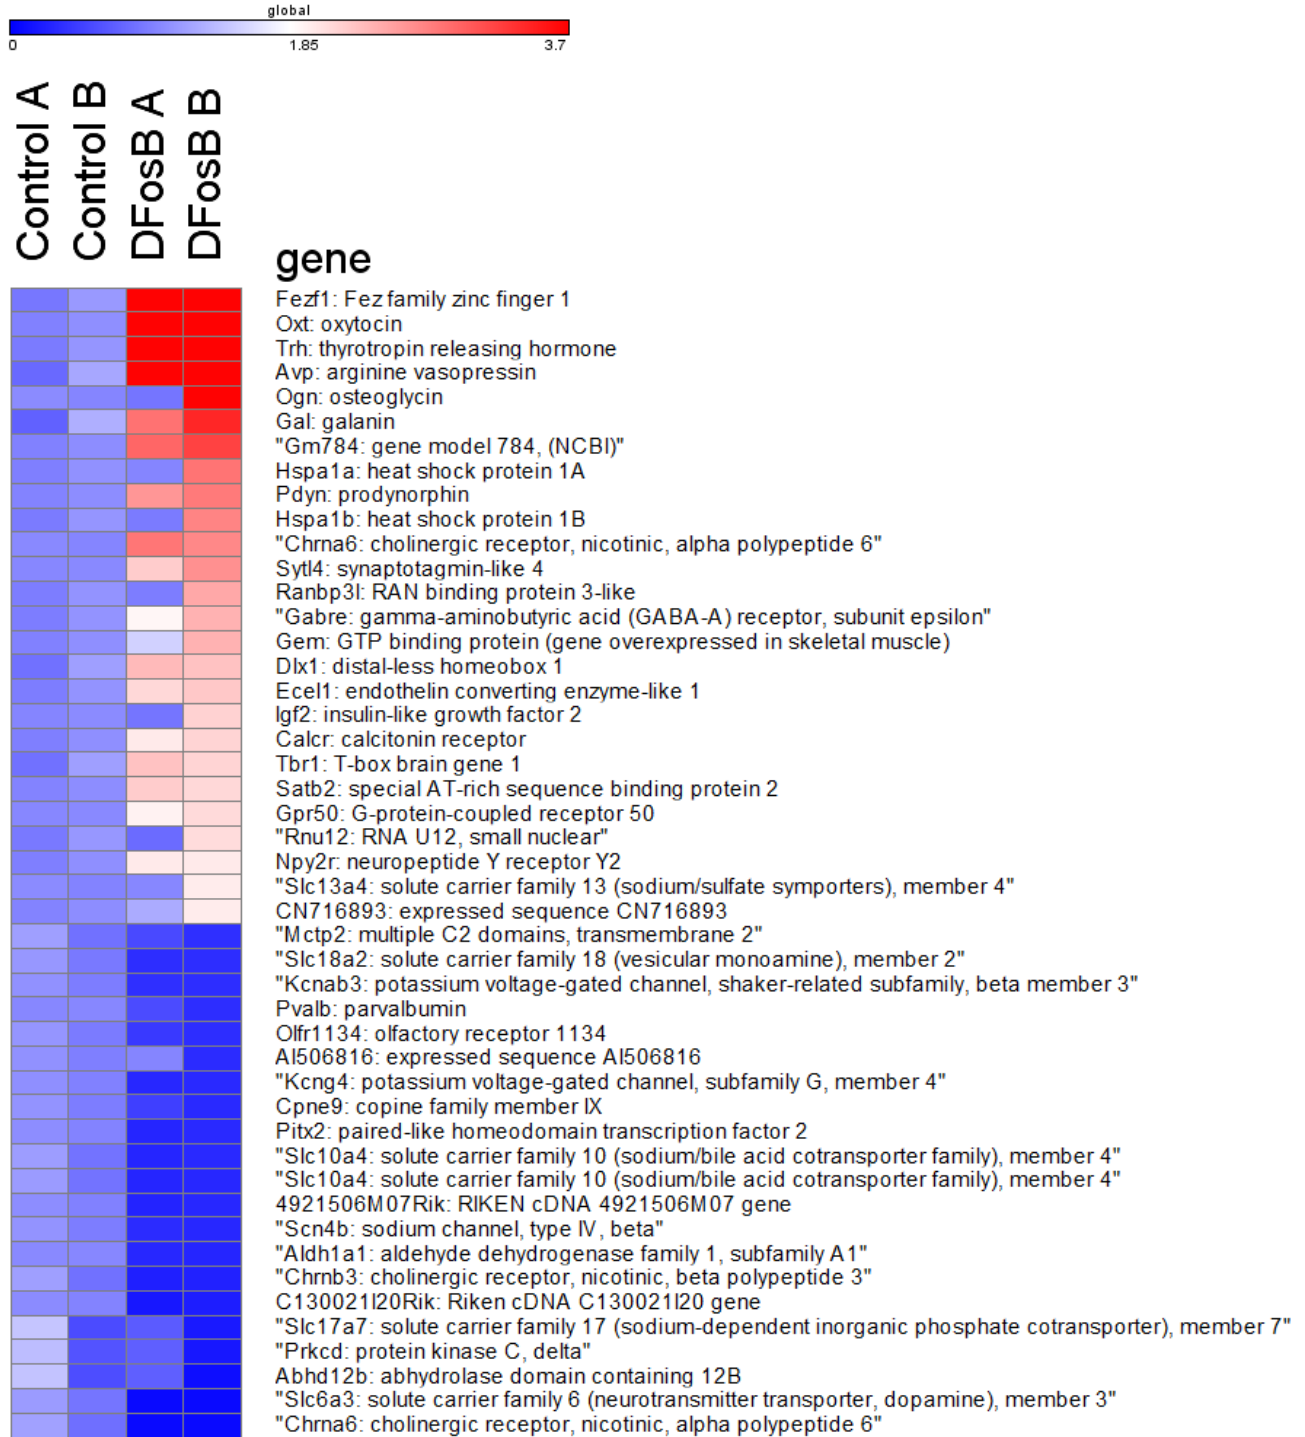

1

2 **Figure S9. Microarray heatmap of ENO2-ΔFosB mice hypothalamic compared to control. Related**  
3 **to Figure 3.** Heatmap displays only the genes regulated >2 fold and <0.35 fold (n=2)

4

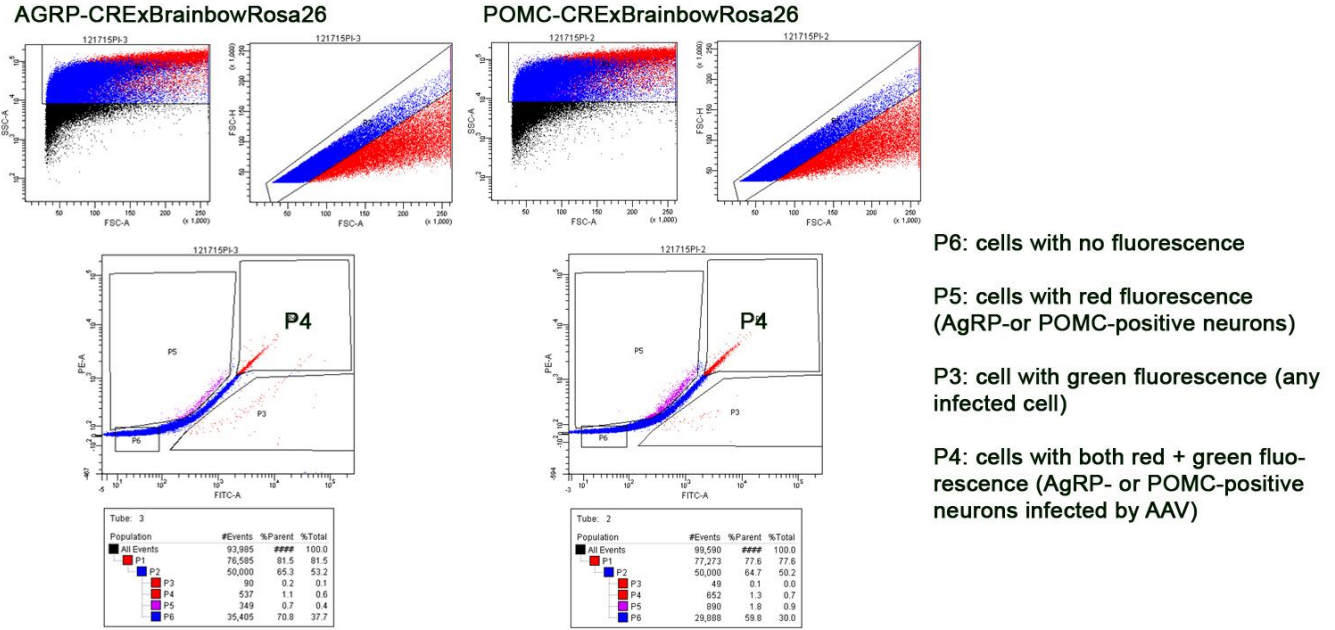

1

2 **Figure S10. FACS sorting of primary hypothalamic AgRP and POMC neurons. Related to Figure**  
 3 **3.** AgRP-CRE (or POMC-CRE) mice were crossed with reporter BrainbowRosa26-2, marking all AgRP  
 4 neurons single, unique color (predominantly red). Recombined mice were then injected with GFP-AAV  
 5 or  $\Delta$ FosB-AAV (green), primary hypothalamic neurons isolated and subjected to FACS. After eliminating  
 6 cell debris (P1) and cells clusters (P2) by forward and side scatters fluorescence channels FITC-A (green)  
 7 and PE-A (red) were applied and 4 distinct cells populations were sorted, as indicated above. Infected  
 8 AgRP and POMC cells (P4) comprise about 0.6-0.7% of total population, respectively (n=4).

9

10

11

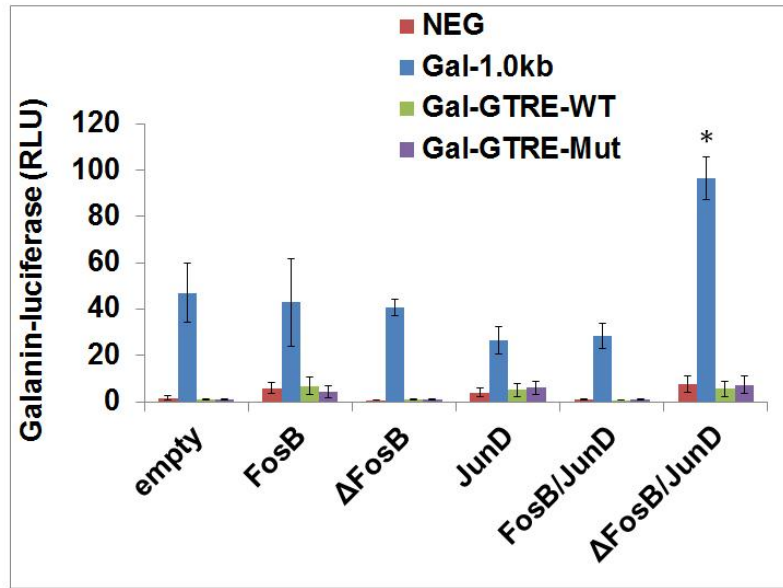

1

2 **Figure S11. Galanin GTRE octamer (TGACGCGG) fails to activate luciferase transcription.**

3 *Related to Figure 3.* Gal promoter region sequence 3414552-34264 (288 bp) containing the GTRE  
 4 octamer TGACGCGG (wild-type) or GGCAGCGG (mutant) was subcloned into luciferase pEZX-PG04  
 5 reporter vector. Gal-1kb-pEZX-PG04 (1008 kb upstream and 244 bp downstream of TSS) was used as  
 6 positive control and empty pEZX-PG04 was used as negative control. Luciferase assay was performed  
 7 using various combinations of AP-1 factors transfected into HEK293 cells with pEZX-PG04 constructs  
 8 carrying Gal 1kb promoter or GTRE fragments.

9

10

11

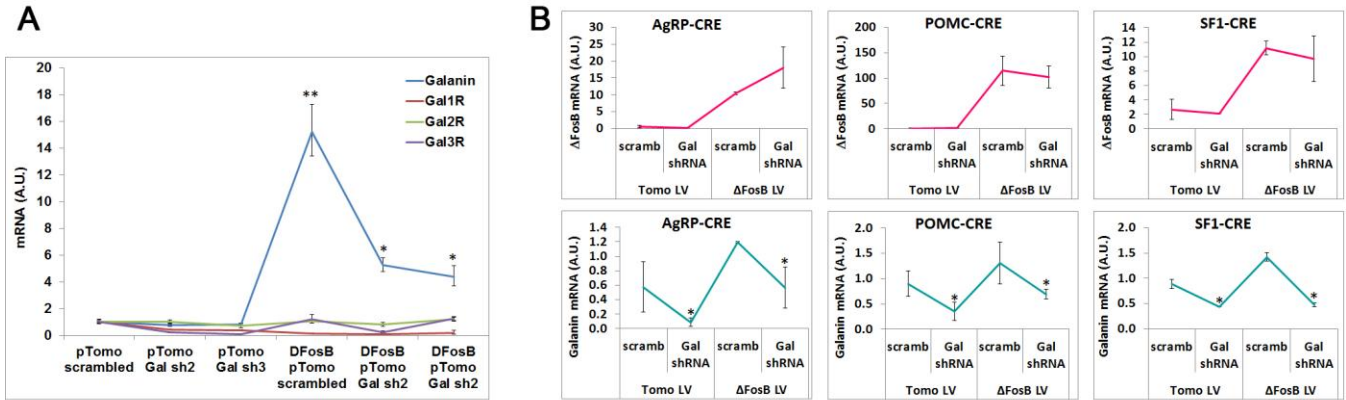

1

2 **Figure S12. Validation of CRE-inducible  $\Delta$ FosB galanin shRNA LV in mHypoE42 cell line and *ex-***  
 3 ***vivo*, upon injection into the VHT of neuronal promoter CRE mice. Related to Figure 5. A. Real time**  
 4 **PCR analysis of galanin and its receptors mRNA levels in mHypoE42 cell line transfected with CRE-**  
 5 **inducible AP-1 shRNA constructs, in the presence of CRE (n=3). Statistical analysis included t-test**  
 6 **\*p<0.05, \*\*p<0.01. B. Real time PCR analysis of  $\Delta$ FosB and galanin mRNA expression levels in the**  
 7 **whole hypothalami of neuronal promoter CRE mice, VHT-injected with AP-1 shRNA LV (n=4).**  
 8 **Statistical analysis included t-test \*p<0.05 comparing GalshRNA group to respective scrambled control.**

9

10

11

12

13

14

15

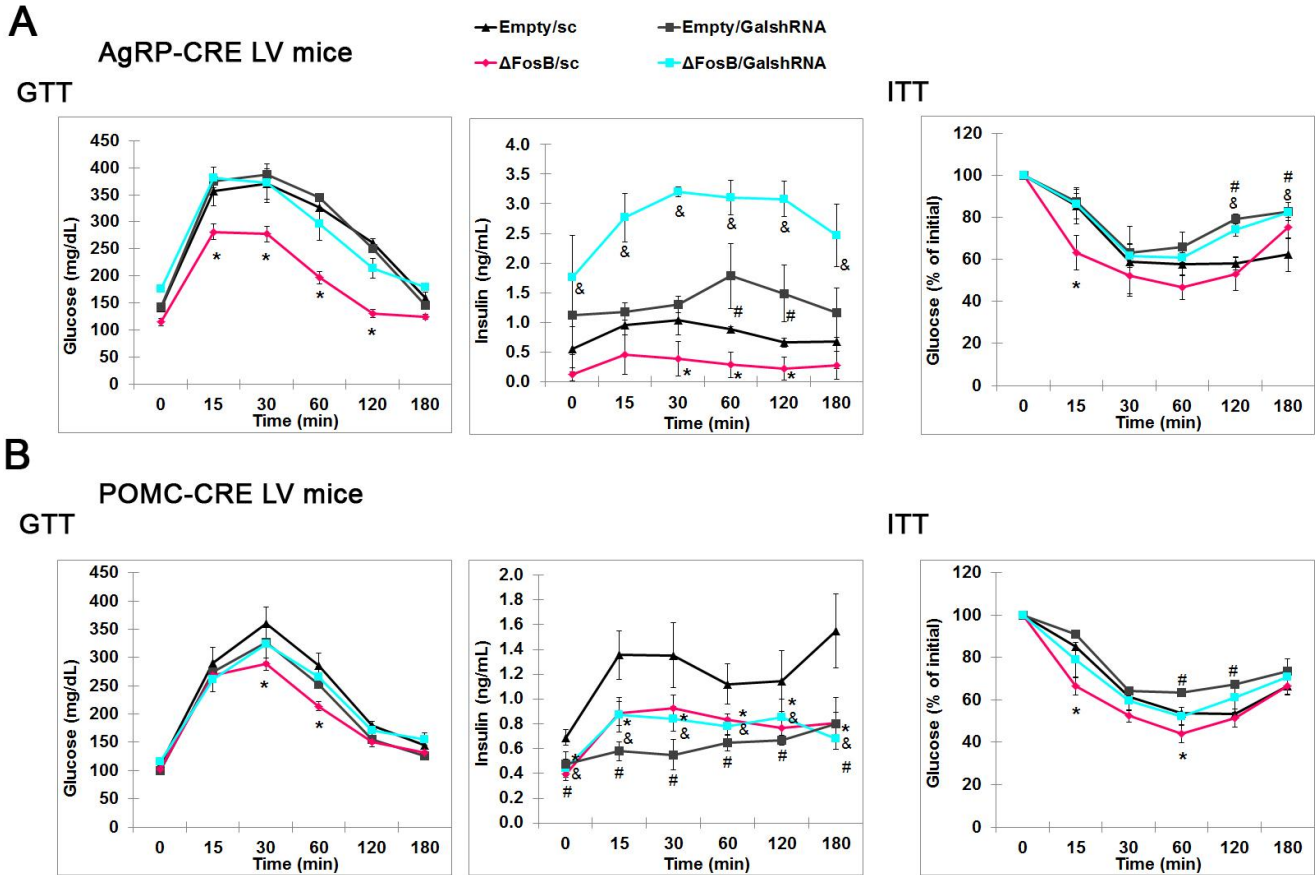

1  
2

3 **Figure S13. Silencing of galanin counteracts  $\Delta$ FosB-enhanced glucose tolerance and insulin**  
 4 **sensitivity in AgRP and POMC neurons. Related to Figure 5.** CRE-inducible FLAG tagged  $\Delta$ FosB  
 5 pTomo or empty pTomo constructs were modified to incorporate H1 promoter and scrambled or galanin  
 6 shRNA. These constructs were packaged into LV and stereotaxically delivered to VHT of neuronal  
 7 promoter AgRP-CRE or POMC-CRE mice. 6 weeks post-injection glucose metabolism was assessed. A.  
 8 GTT and ITT in AgRP mice. B. GTT and ITT in POMC mice; statistical analysis included ANOVA  
 9 followed by Tukey-Kramer HSD test, comparing individual groups to Empty/sc control, \* $p < 0.05$  for  
 10  $\Delta$ FosB group; & $p < 0.05$  for Empty/GalshRNA group; # $p < 0.05$  for  $\Delta$ FosB/GalshRNA group (n=5-8).



| Neuron      | AP1 effects on METABOLISM |      |                   |                            |      |                   | AP1 effects on BONE |      |                   |                   |      |                   |                      |      |                   |
|-------------|---------------------------|------|-------------------|----------------------------|------|-------------------|---------------------|------|-------------------|-------------------|------|-------------------|----------------------|------|-------------------|
|             | <i>Energy Expenditure</i> |      |                   | <i>Glucose Utilization</i> |      |                   | <i>Formation</i>    |      |                   | <i>Resorption</i> |      |                   | <i>Net bone mass</i> |      |                   |
|             | $\Delta$ FosB             | FosB | Galanin dependent | $\Delta$ FosB              | FosB | Galanin dependent | $\Delta$ FosB       | FosB | Galanin dependent | $\Delta$ FosB     | FosB | Galanin dependent | $\Delta$ FosB        | FosB | Galanin dependent |
| <b>AGRP</b> | ↑                         | ↓    | Yes               | ↑                          | =    | Yes               | ↑                   | =    | Yes               | ↓                 | =    | Yes               | ↑                    | =    | Yes               |
| <b>POMC</b> | ↑                         | ↓    | Yes               | ↑                          | =    | Yes               | ↑                   | =    | Yes               | ↑                 | =    | Yes               | ↑                    | =    | Yes               |
| <b>SF1</b>  | ↑                         | =    | Yes               | ↑                          | =    | Yes               | ↓                   | =    | No                | ↑                 | =    | No                | ↓                    | =    | No                |

1

2 **Figure S14. Summary of metabolic and bone effects following AP1 alteration in VHT**

3 AP1 transcriptional activity in VHT affects whole body metabolism and bone homeostasis. Targeted  
4 alteration of AP1 in AgRP and POMC neurons increases energy expenditure, glucose utilization, and bone  
5 density. These effects are dependent upon the local availability of the neurotransmitter galanin. The  
6 increase in bone mass is achieved via differential mechanisms: in AgRP neurons bone formation is  
7 increased and resorption is decreased, while in POMC neurons, both formation and resorption are  
8 increased. Although, AgRP and POMC neurons are commonly classified as orexigenic and anorexigenic,  
9 respectively, our data suggests that under certain conditions, such as altered AP1 transcription, both types  
10 of ARC neurons can function in accord to promote energy catabolism and bone anabolism. In contrast to  
11 ARC, targeted alteration of AP1 signaling in the VMH residing SF1 neurons, increases energy expenditure  
12 and glucose metabolism, but decreases bone mass, in a galanin-independent manner. These data suggest  
13 that energy and bone homeostasis are not inexorably linked, but are rather two mechanistically dissociated  
14 processes.

15

16

17
